# Supplementary material
Source: publisher figshare collection journal article supplement (https://acs.figshare.com/ndownloader/files/26730677)
Supplement: Supplementary file 1 [file 26730677]

## Supporting Information

### **Chlorine rechargeable halamine biocidal alginate/polyacrylamide hydrogel beads for improved sanitization of fresh produce**

Yuehan Wu<sup>a, b</sup>, Yang Si<sup>a, ^</sup>, Shilin Liu<sup>b</sup>, Nitin Nitin<sup>a, c</sup>, Gang Sun<sup>a, \*</sup>

<sup>a</sup> Department of Biological and Agricultural Engineering, University of California,  
Davis, CA 95616, USA

<sup>b</sup> College of Food Science & Technology, Huazhong Agricultural University, Wuhan  
430070, China

<sup>c</sup> Department of Food Science and Technology, University of California, Davis, CA  
95616, USA

\* Corresponding author

<sup>^</sup> current address: College of Textiles, Donghua University, Shanghai, China

E-mail: [gysun@ucdavis.edu](mailto:gysun@ucdavis.edu) (Gang Sun)

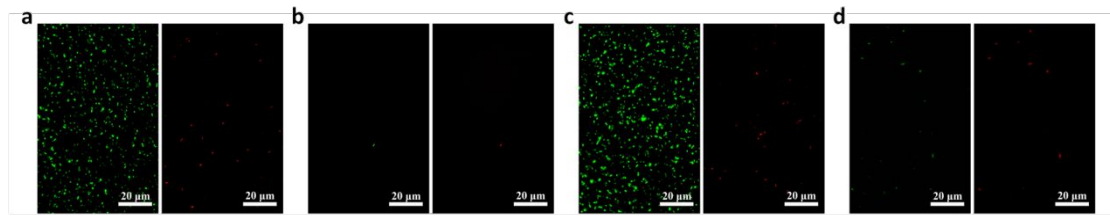

**Figure S1** SG and PI stained images of *E. coli* cells in contact with control AHB beads

(a) and chlorine charged AHB beads (b). SG and PI stained images of *L. innocua* cells

in contact with control AHB beads (c) and chlorine charged AHB beads (d).

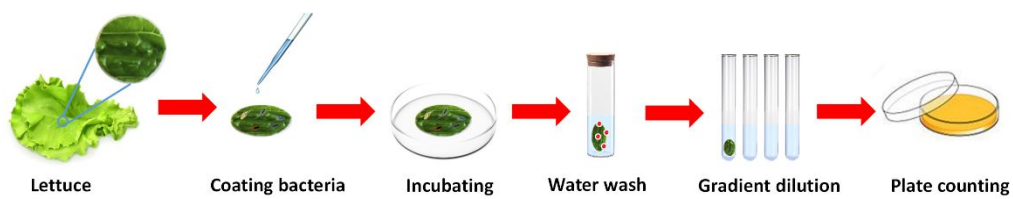

**Figure S2** Scheme of simulating lettuce washing and sanitizing process. (Incubation time 2h; water washing time 10min)

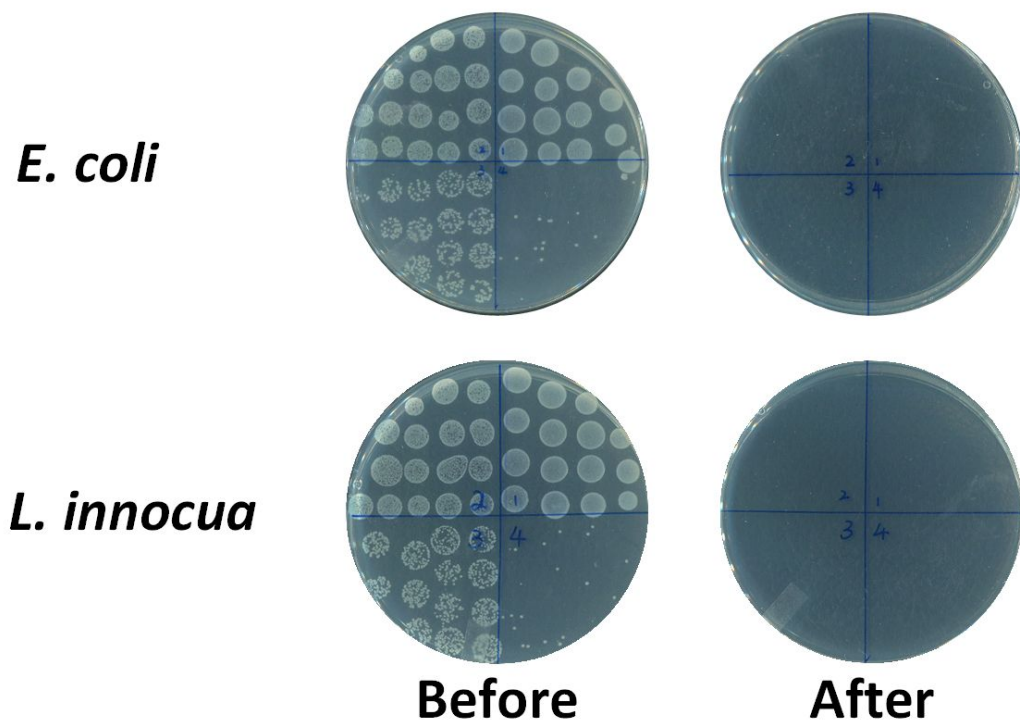

26

27 **Figure S3** *E. coli* and *L. innocua* harvested from lettuce surface before and after  
 28 washing with the water containing the chlorine charged AHB beads.
